# Supplementary figures and images for: Shared inflammatory and skin-specific gene signatures reveal common drivers of discoid lupus erythematosus in canines, humans and mice
Source: PubMed Central journal article supplement — Curr Res Immunol. 2021 Mar 31;2:41–51. doi: 10.1016/j.crimmu.2021.03.003 (PMC9040131; doi:10.1016/j.crimmu.2021.03.003), 2021-03-31

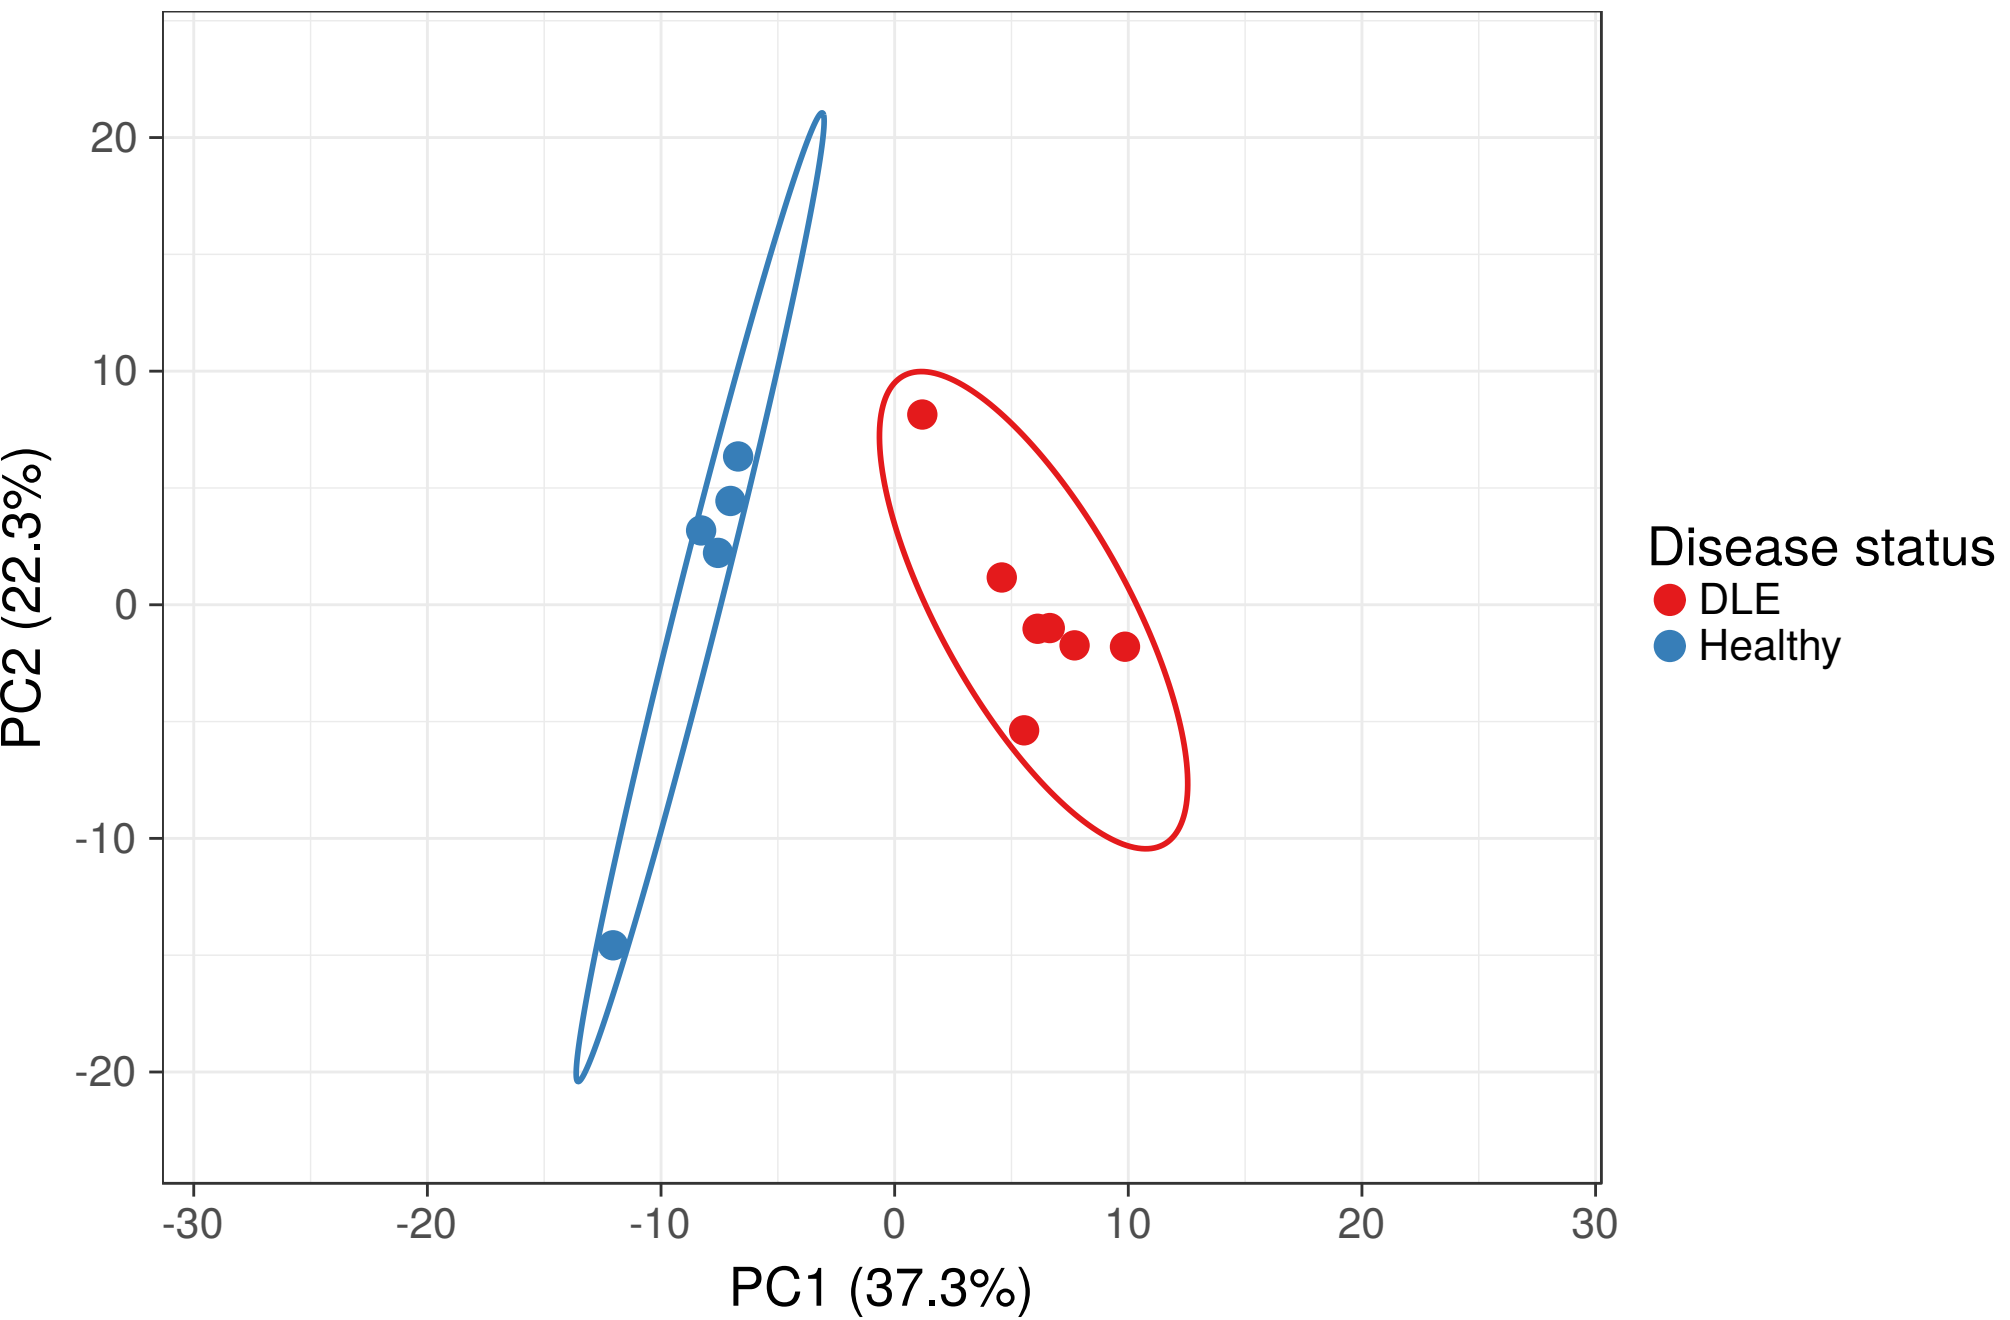

Supplement: mmc4.pdf [file mmc4.pdf]
